# Supplementary material for: SETDB1 Regulates Porcine Spermatogonial Adhesion and Proliferation through Modulating MMP3/10 Transcription
Source: MDPI journal article supplement (doi:10.3390/cells11030370), 2022-01-22
Supplement: s1 [file s1]

**Table S1. Oligo information.**

| Oligo name        | Sequences (5'–3')             |
|-------------------|-------------------------------|
| siSETDB1-1-sense  | GCUCCUUUGUCUGUAUUUATT         |
| siSETDB1-1-anti   | UAAAUACAGACAAAGGAGCTT         |
| siSETDB1-2-sense  | GGGAUUGCCAUAUAAAUCAATT        |
| siSETDB1-2-anti   | UUGAUUUAAUGGCAAUCCCTT         |
| siCtrl-sense      | UUCUCCGAACGUGUCACGUTT         |
| siCtrl-anti       | ACGUGACACGUUCGGAGAATT         |
| <i>HPRT1</i> -F   | GAAGAGCTACTGTAATGACCAGTCAACGG |
| <i>HPRT1</i> -R   | TCATTGTAGTCAAGGGCATAGCCTACC   |
| <i>GAPDH</i> -F   | ACACTCACTCTTCTACCTTTG         |
| <i>GAPDH</i> -R   | CAAATTCATTGTCGTACCAG          |
| <i>SETDB1</i> -F  | TGGATCTATCGAGGCTCTACACG       |
| <i>SETDB1</i> -R  | ACTGGACCACAGGACCTTTGC         |
| <i>MMP3/10</i> -F | GGCCTGCCCAAGTGGAGAAA          |
| <i>MMP3/10</i> -R | GCGGAGTCACTTCCTCCCAG          |
